# Supplementary material for: Characterization of NGFFYamide Signaling in Starfish Reveals Roles in Regulation of Feeding Behavior and Locomotory Systems
Source: Front Endocrinol (Lausanne). 2018 Sep 19;9:507. doi: 10.3389/fendo.2018.00507 (PMC6156427; doi:10.3389/fendo.2018.00507)
Supplement: Supplementary file 1 [file Table_1.XLSX]

## Sheet: Sheet1
Receptor	Organism	Receptor	Accession number	Deorphanised?
A. rub (NGFFYaR)	Asterias rubens	NGFFYamide	KP171535 (c)	This paper
A. jap (NPSR)	Apostichopus japonicus	NPS-type	PIK35938 (c)	-
S. pur (NGFFFaR)	Strongylocentrotus purpuratus	NGFFFamide	KP171538 (c)	Semmens et al., 2015
A. med (NPSR)	Antedon mediterranea	NPS-type	KP171537 (c)	-
S. kow (NPSR)	Saccoglossus kowalevskii	NPS-type	XP_006813812 (b)	-
H. sap (NPSR)	Homo sapiens	NPS	Q6W5P4 (a)	Xu et al., 2004
B. flo 1 (NPSR)	Branchiostoma floridae	NPS-type	XP_002605431 (b)	-
B. flo 2 (NPSR)	Branchiostoma floridae	NPS-type	XP_002605430 (b)	-
L. gig 1 (CCAPR)	Lottia gigantea	CCAP-type	XP_009061331 (b)	-
L. gig 2 (CCAPR)	Lottia gigantea	CCAP-type	XP_009047631 (b)	-
L. gig 3 (CCAPR)	Lottia gigantea	CCAP-type	XP_009052107 (b)	-
C. tel (CCAPR)	Capitella teleta	CCAP-type	ELU12393 (c)	-
T. cas 1 (CCAPR)	Tribolium castaneum	CCAP	ADI48561 (c)	Li et al., 2011
T. cas 2 (CCAPR)	Tribolium castaneum	CCAP	NP_001076795 (b)	Li et al., 2011
A. gam (CCAPR)	Anopheles gambiae	CCAP	AY500851 (c)	Belmont et al., 2006
D. mel (CCAPR)	Drosophila melanogaster	CCAP	AY219842 (c)	Cazzamali et al., 2003
H. sap (OTR)	Homo sapiens	OT	P30559 (a)	Kimura et al., 1992
H. sap (V1aR)	Homo sapiens	VP	P37288 (a)	Thibonnier et al., 1994
H. sap (V1bR)	Homo sapiens	VP	P47901 (a)	Sugimoto et al., 1994
H. sap (V2R)	Homo sapiens	VP	P30518 (a)	Lolait et al., 1992
S. kow (VPR/OTR)	Saccoglossus kowalevskii	VP/OT-type	XP_002735546 (b)	-
S. pur (VPR/OTR)	Strongylocentrotus purpuratus	VP/OT-type	XP_784373 (b)	-
A. jap (VPR/OTR)	Apostichopus japonicus	VP/OT-type	PIK60987 (c)	-
L. sta (VPR/OTR)	Lymnaea stagnalis	VP/OT	AAA91998 (c)	van Kesteren et al., 1995
E. fet (VPR/OTR)	Eisenia fetida	VP/OT	AB121771 (c)	Kawada et al., 2004
T. cas (VPR/OTR)	Tribolium castaneum	VP/OT	DAA64486 (c)	Aikins et al., 2008; Stafflinger et al., 2008
H. sap (TRHR)	Homo sapiens	TRH	ENSG00000174417 (a)	Duthie et al., 1993
S. kow (TRHR)	Saccoglossus kowalevskii	TRH-type	XP_002730943 (b)	-
S. pur (TRHR)	Strongylocentrotus purpuratus	TRH-type	XP_783972.2 (b)	-
P. dum (TRHR)	Platynereis dumerilii	TRH	AKQ63029 (c)	Bauknecht & Jekely, 2015
P. cau (TRHR)	Priapulus caudatus	TRH-type	XP_014663378 (b)	-
D. pul (TRHR)	Daphnia pulex	TRH-type	ADZ15312 (c)	-
C. ele (TRHR)	Caenorhabditis elegans	TRH	CCD66234 (c)	Van Sinay et al., 2017
Key
(a) = UniProt database
(b) = NCBI database
(c) = GenBank database
(d) = JGI database
References (PMID)
Xu et al., 2004 (PMID: 15312648)
Semmens et al., 2015 (PMID: 25904544)
Li et al., 2011 (PMID: 21708161)
Belmont et al., 2006 (PMID: 16616003)
Cazzamali et al., 2003 (PMID: 12646179)
Thibonnier et al., 1994 (PMID: 8106369)
Sugimoto et al., 1994 (PMID: 7929452)
Lolait et al., 1992 (PMID: 1534150)
Kimura et al., 1992 (PMID: 1313946)
van Kesteren et al., 1995 (PMID: 7576638)
Kawada et al., 2004 (PMID: 15175002)
Aikins et al., 2008 (PMID: 18549960)
Stafflinger et al., 2008 (PMID: 18316733 )
Duthie et al., 1993 (PMID: 8243797)
Bauknecht & Jekely, 2015 (PMID: 26190115 )
Van Sinay et al., 2017 (PMID: 28461507)
